# Supplementary material for: Evaluation of a collar‐mounted accelerometer for detecting seizure activity in dogs
Source: PubMed Central journal article supplement (PMC7255659; doi:10.1111/jvim.15760), 2020-04-15
Supplement: JVIM-34-1239-s002.pdf [file JVIM-34-1239-s002.pdf]

## QUALITY OF LIFE QUESTIONNAIRE

Name: \_\_\_\_\_

Date: \_\_\_\_\_

For each of the following, circle the most appropriate answer:

|     |                                                                                                        | <b>Agree<br/>Strongly</b> | <b>Agree</b> | <b>Neutral</b> | <b>Disagree</b> | <b>Disagree<br/>Strongly</b> |
|-----|--------------------------------------------------------------------------------------------------------|---------------------------|--------------|----------------|-----------------|------------------------------|
| 1.  | In the last 3 months, the frequency of seizures in my dog was acceptable.                              | 1                         | 2            | 3              | 4               | 5                            |
| 2.  | In the last 3 months, the severity of seizures in my dog was acceptable.                               | 1                         | 2            | 3              | 4               | 5                            |
| 3.  | In the last 3 months, the seizures in my dog were well managed overall.                                | 1                         | 2            | 3              | 4               | 5                            |
| 4.  | In the past 3 months, my dog's attitude has been good.                                                 | 1                         | 2            | 3              | 4               | 5                            |
| 5.  | In the past 3 months, my dog's activity level has been good.                                           | 1                         | 2            | 3              | 4               | 5                            |
| 6.  | In the past 3 months, my dog's overall quality of life has been good.                                  | 1                         | 2            | 3              | 4               | 5                            |
| 7.  | In the past 3 months, I worried about the frequency of seizures in my dog.                             | 1                         | 2            | 3              | 4               | 5                            |
| 8.  | In the past 3 months, I worried about the severity of seizures in my dog.                              | 1                         | 2            | 3              | 4               | 5                            |
| 9.  | I experience limitations in my work, education, or day to day activities because of my dog's seizures. | 1                         | 2            | 3              | 4               | 5                            |
| 10. | I experience limitations to my social life because of my dog's seizures.                               | 1                         | 2            | 3              | 4               | 5                            |
| 11. | Overall, caring for my epileptic dog causes limitations on my life.                                    | 1                         | 2            | 3              | 4               | 5                            |

Questions continue on other side.

|     |                                                                                                                                            | <b>Never</b> | <b>Rarely</b> | <b>Some-<br/>times</b> | <b>Often</b> | <b>Very<br/>Often</b> |
|-----|--------------------------------------------------------------------------------------------------------------------------------------------|--------------|---------------|------------------------|--------------|-----------------------|
| 12. | In the past 3 months, how often did you feel like your dog's epilepsy caused conflict with your work, education, or day to day activities? | 1            | 2             | 3                      | 4            | 5                     |
| 13. | In the past 3 months, how often did you feel that your dog's epilepsy limited your social life?                                            | 1            | 2             | 3                      | 4            | 5                     |
| 14. | In the past 3 months, how often did you feel that your dog's epilepsy limited your independence?                                           | 1            | 2             | 3                      | 4            | 5                     |
| 15. | In the past 3 months, how often has your dog had structured exercise (walks, play, etc.) each day?                                         | 1            | 2             | 3                      | 4            | 5                     |

From the following list, please choose the exercise that your dog has engaged in over the last 3 months, and estimate the time engaged in these activities per week.

- | <u>Activity</u>                                              | <u>Estimated Amount of Time Per Week</u> |
|--------------------------------------------------------------|------------------------------------------|
| <input type="checkbox"/> Walk                                | _____minutes                             |
| <input type="checkbox"/> Run                                 | _____minutes                             |
| <input type="checkbox"/> Play with other dog                 | _____minutes                             |
| <input type="checkbox"/> Fetch                               | _____minutes                             |
| <input type="checkbox"/> Hike                                | _____minutes                             |
| <input type="checkbox"/> Agility (or similar training/event) | _____minutes                             |
| <input type="checkbox"/> Other (specify) _____               | _____minutes                             |
